# Supplementary material for: Dynamic alterations in monocyte numbers, subset frequencies and activation markers in acute and convalescent COVID-19 individuals
Source: PubMed Central journal article supplement (PMC8511073; doi:10.1038/s41598-021-99705-y), 2021-10-12
Supplement: 41598_2021_99705_MOESM1_ESM.pdf [file 41598_2021_99705_MOESM1_ESM.pdf]

Supplementary Figure.1.

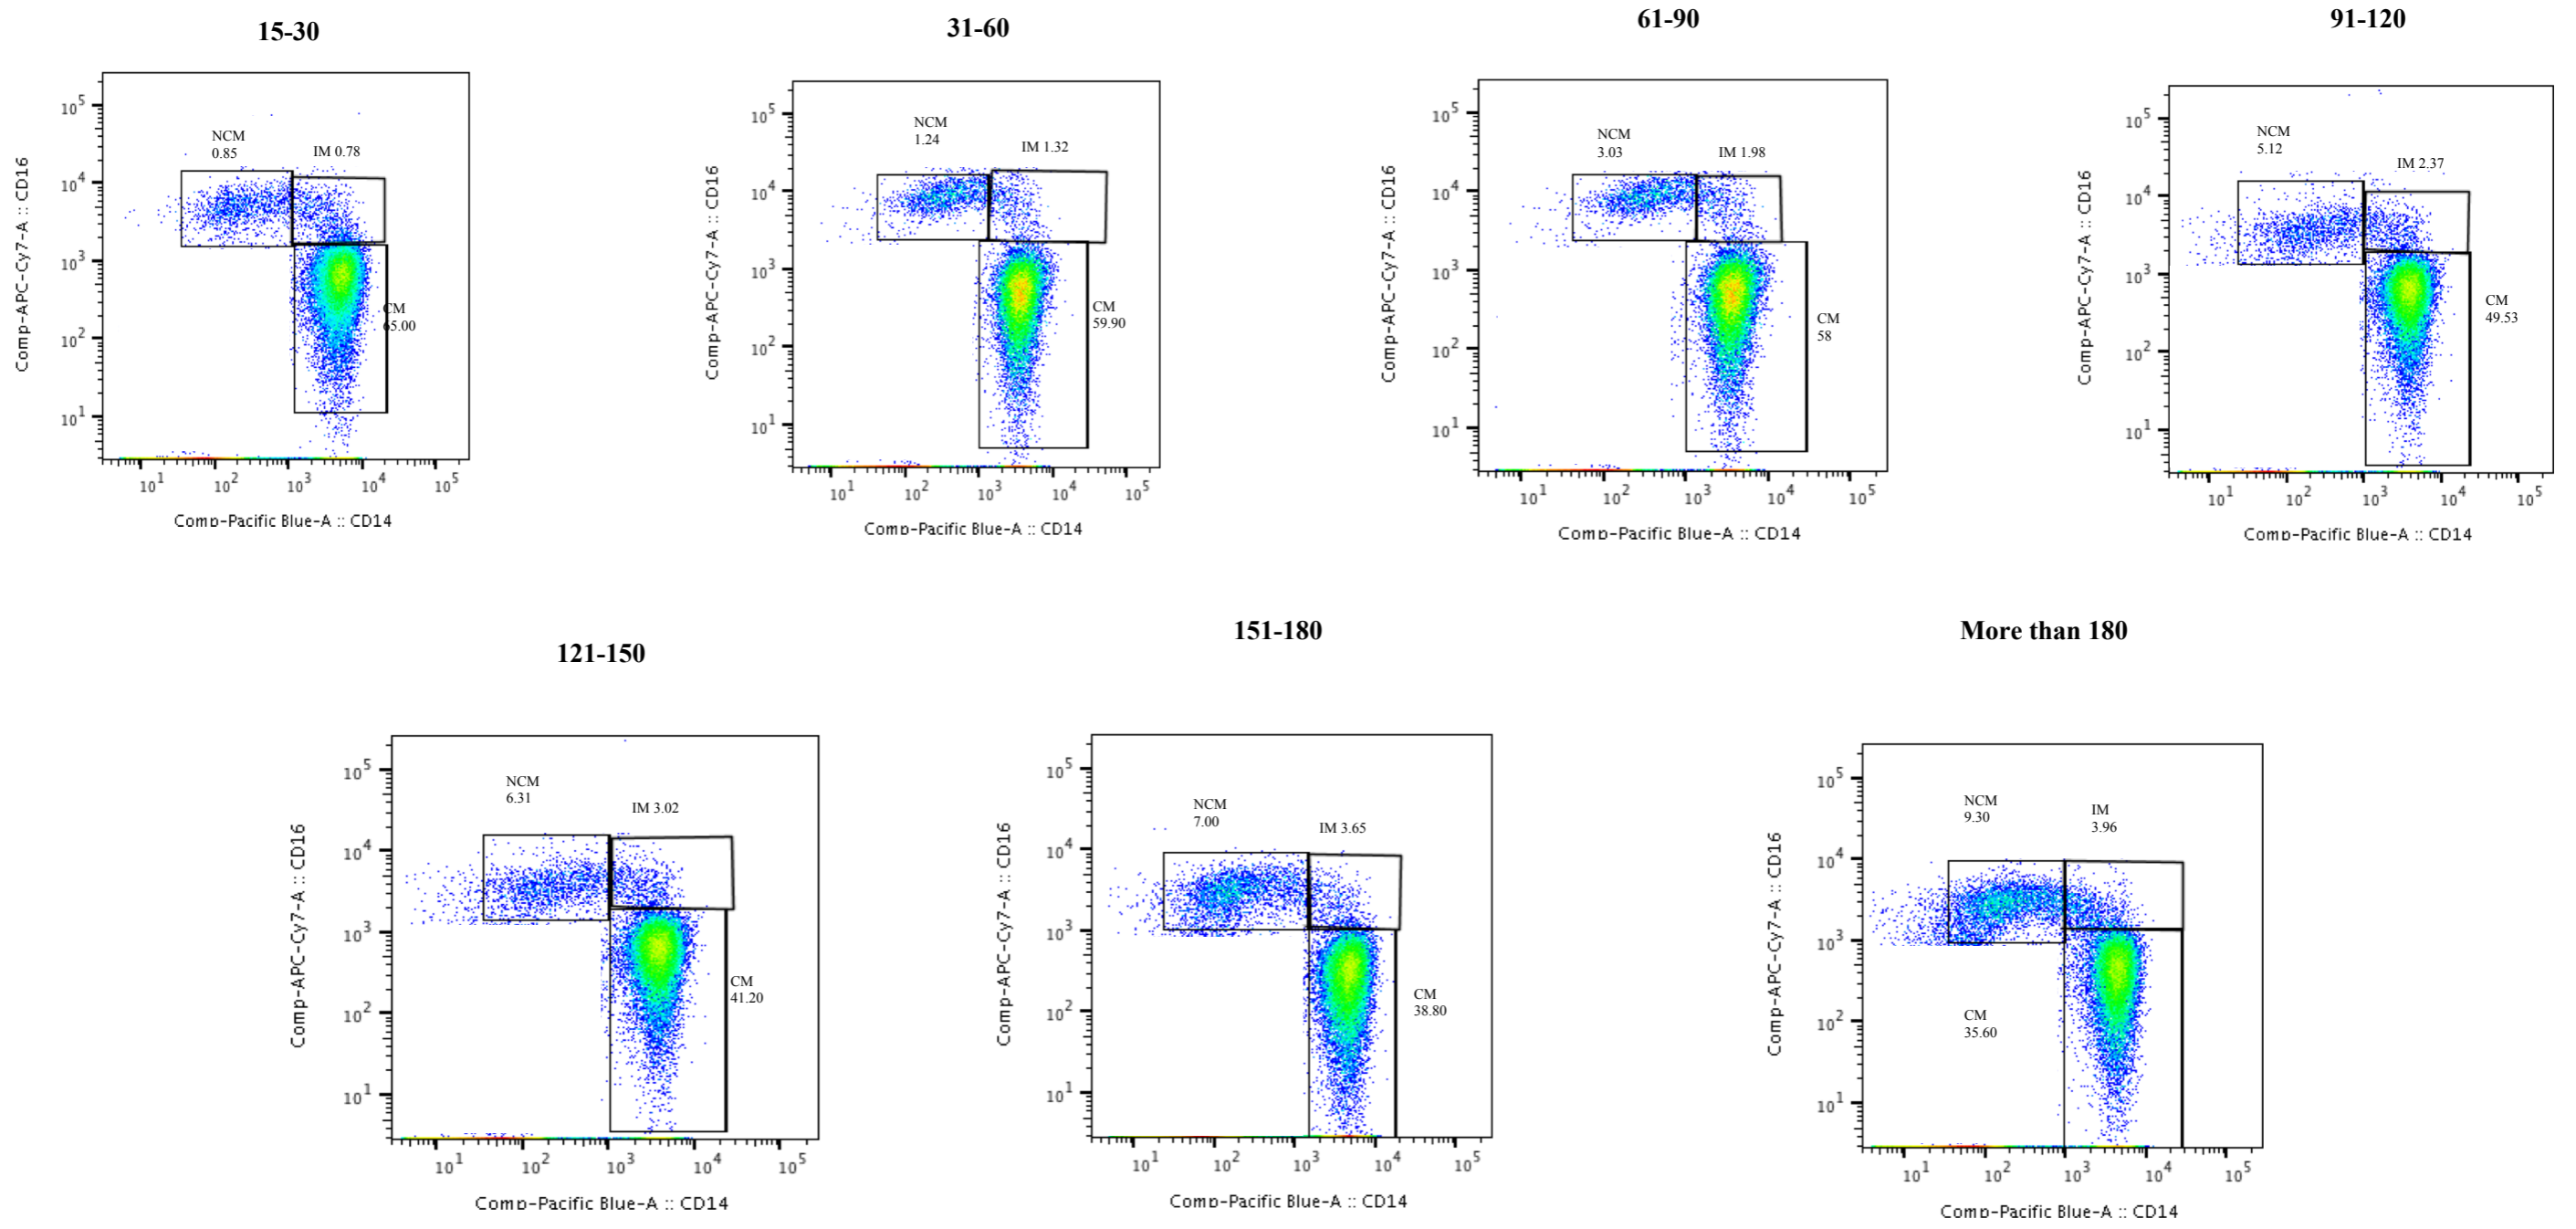

**Supplementary Figure.1.** A representative flow cytometry plot showing the gating strategy for estimation of monocyte subsets of 15-30, 31-60, 61-90, 91-120, 121-150, 151-180 and more than 180 days since RT-PCR confirmation of SARS-CoV2 infection.. Classical monocytes were classified as CD45<sup>+</sup> HLA-DR<sup>+</sup> CD14<sup>hi</sup>CD16<sup>-</sup>; intermediate monocytes as CD45<sup>+</sup> HLA-DR<sup>+</sup> CD14<sup>hi</sup> CD16<sup>dim</sup> and non-classical monocytes were classified as CD45<sup>+</sup>HLADR<sup>+</sup> CD14<sup>dim</sup>CD16<sup>hi</sup>.
